# Supplementary material
Source: PubMed Central journal article supplement (PMC9868063)
Supplement: NIHMS1830982-supplement-1.pdf [file NIHMS1830982-supplement-1.pdf]

**Supplementary Table 1. Proportion Biochemically Confirmed Abstinent by 16 Randomized Treatment Groups (n=66 per group)**

| Group | Intervention          | Abstinent (%) | OR   | 95% Confidence Limits |      | Adj OR* | 95% Confidence Limits |      |
|-------|-----------------------|---------------|------|-----------------------|------|---------|-----------------------|------|
|       |                       |               |      | REF                   | REF  |         | REF                   | REF  |
| 1     | None                  | 2 (3.0)       | REF  | REF                   | REF  | REF     | REF                   | REF  |
| 2     | Text Only             | 2 (3.0)       | 1.0  | 0.1                   | 7.3  | 1.0     | 0.1                   | 7.7  |
| 3     | BNI Only              | 4 (6.2)       | 2.1  | 0.4                   | 11.9 | 2.2     | 0.4                   | 12.4 |
| 4     | NRT Only              | 7 (10.6)      | 3.8  | 0.8                   | 19.0 | 4.0     | 0.8                   | 20.2 |
| 5     | QL Only               | 5 (7.7)       | 2.7  | 0.5                   | 14.3 | 2.6     | 0.5                   | 14.2 |
| 6     | Text + BNI            | 8 (12.1)      | 4.4  | 0.9                   | 21.6 | 4.4     | 0.9                   | 21.9 |
| 7     | Text + NRT            | 12 (18.2)     | 7.1  | 1.5                   | 33.2 | 6.9     | 1.5                   | 32.4 |
| 8     | Text + QL             | 5 (7.7)       | 2.7  | 0.5                   | 14.3 | 2.5     | 0.5                   | 13.5 |
| 9     | BNI + NRT             | 7 (10.6)      | 3.8  | 0.8                   | 19.0 | 3.8     | 0.8                   | 19.0 |
| 10    | BNI + QL              | 8 (12.1)      | 4.4  | 0.9                   | 21.6 | 4.5     | 0.9                   | 22.0 |
| 11    | NRT + QL              | 7 (10.6)      | 3.8  | 0.8                   | 19.0 | 3.7     | 0.7                   | 18.7 |
| 12    | Text + BNI + NRT      | 11 (16.7)     | 6.4  | 1.4                   | 30.1 | 6.6     | 1.4                   | 31.0 |
| 13    | Text + BNI + QL       | 8 (12.1)      | 4.4  | 0.9                   | 21.6 | 4.8     | 1.0                   | 23.5 |
| 14    | Text + NRT + QL       | 7 (10.6)      | 3.8  | 0.8                   | 19.0 | 3.7     | 0.7                   | 18.5 |
| 15    | BNI + NRT + QL        | 17 (25.8)     | 11.1 | 2.4                   | 50.3 | 12.0    | 2.6                   | 54.5 |
| 16    | Text + BNI + NRT + QL | 8 (12.1)      | 4.4  | 0.9                   | 21.6 | 4.4     | 0.9                   | 21.6 |

\*Adjusted for age, sex, race/ethnicity and baseline daily cigarette consumption

**Supplementary Table 2. Parameter estimates (log odds) for the full factorial logistic regression.**

| Variable        | Log Odds | 95% Confidence |       | **Adj | 95%               |       | P value |
|-----------------|----------|----------------|-------|-------|-------------------|-------|---------|
|                 | Estimate | Limits         |       | OR    | Confidence Limits |       |         |
| Intercept       | -2.17    | -2.98          | -1.36 | -     | -                 | -     | <.000   |
| text            | 0.05     | -0.17          | 0.27  | 1.11  | 0.71              | 1.73  | 0.64    |
| bni             | 0.29     | 0.07           | 0.51  | 1.78  | 1.14              | 2.77  | 0.01    |
| nrt             | 0.37     | 0.14           | 0.59  | 2.08  | 1.34              | 3.24  | 0.001   |
| ql              | 0.17     | -0.05          | 0.39  | 1.40  | 0.90              | 2.17  | 0.14    |
| text*bni        | -0.01    | -0.23          | 0.21  | 0.95  | 0.39              | 2.31  | 0.92    |
| text*nrt        | -0.04    | -0.27          | 0.18  | 0.84  | 0.34              | 2.04  | 0.70    |
| text*ql         | -0.18    | -0.40          | 0.04  | 0.49  | 0.20              | 1.19  | 0.12    |
| bni*nrt         | -0.13    | -0.36          | 0.09  | 0.58  | 0.24              | 1.42  | 0.23    |
| bni*ql          | 0.02     | -0.20          | 0.25  | 1.10  | 0.45              | 2.66  | 0.83    |
| nrt*ql          | -0.16    | -0.38          | 0.06  | 0.52  | 0.22              | 1.26  | 0.15    |
| text*bni*nrt    | -0.11    | -0.33          | 0.11  | 0.41  | 0.07              | 2.41  | 0.32    |
| text*bni*ql     | -0.10    | -0.32          | 0.12  | 0.46  | 0.08              | 2.71  | 0.39    |
| text*nrt*ql     | -0.09    | -0.31          | 0.14  | 0.50  | 0.09              | 2.96  | 0.45    |
| bni*nrt*ql      | 0.16     | -0.06          | 0.38  | 3.52  | 0.60              | 20.62 | 0.16    |
| text*bni*nrt*ql | -0.03    | -0.25          | 0.19  | 0.64  | 0.02              | 22.28 | 0.81    |
| sex (F)         | 0.17     | -0.23          | 0.57  | 1.19  | 0.80              | 1.77  | 0.40    |

|                                            |       |       |       |      |      |      |      |
|--------------------------------------------|-------|-------|-------|------|------|------|------|
| age                                        | 0.01  | -0.01 | 0.02  | 1.01 | 0.99 | 1.02 | 0.45 |
| White                                      | -0.20 | -0.73 | 0.33  | 0.82 | 0.48 | 1.39 | 0.46 |
| Asian/Other                                | -0.25 | -0.49 | -1.43 | 0.45 | 0.24 | 1.57 | 0.31 |
| Black                                      | -0.28 | -0.80 | 0.24  | 0.76 | 0.45 | 1.28 | 0.30 |
| Baseline Daily<br>Cigarette<br>Consumption | -0.03 | -0.06 | 0.00  | 0.97 | 0.94 | 1.00 | 0.04 |
|                                            |       |       |       |      |      |      |      |

\*Effect coding was used for intervention parameters so log odds estimates can't be directly exponentiated to get odds ratios. For instance, the odds ratio for main effects are obtained by exponentiating  $2 \cdot \log\text{odds}$ .

\*\*Adjusted for age, sex, race/ethnicity and baseline daily cigarette consumption
